# Supplementary material for: No evidence of host-specific egg mimicry in Asian koels
Source: PLoS One. 2021 Jul 9;16(7):e0253985. doi: 10.1371/journal.pone.0253985 (PMC8270166; doi:10.1371/journal.pone.0253985)
Supplement: S4 Data — Asian koel eggs from common myna nests, compared to three host species, and Asian koel eggs from long-tailed shrike nests. Location: Jahangirnagar University campus, Bangladesh. Data collection year: 2015. (CSV) [file pone.0253985.s008.csv]

id	plot	chrom	species	JND	SD	SE	sign
1	B_UVS	Chrom_JND	HC	3.9165165983	0.9787016517	0.4376886846	a
2	B_UVS	Chrom_JND	CM	4.8841752751	1.1854746253	0.5301603696	a
3	B_UVS	Chrom_JND	LTS	3.1720729103	0.8022092804	0.3587588966	ab
4	B_UVS	Chrom_JND	AK_LTS	1.9814411392	0.2583189765	0.1155237583	b
5	B_VS	Chrom_JND	HC	3.3036377263	1.0608415669	0.4744227714	ab
6	B_VS	Chrom_JND	CM	4.8870720188	1.1545030639	0.5163094662	a
7	B_VS	Chrom_JND	LTS	2.0154275071	0.6280505371	0.2808727389	bc
8	B_VS	Chrom_JND	AK_LTS	1.6536096752	0.3042935871	0.1360842292	c
9	M_UVS	Chrom_JND	HC	3.8633817978	0.9640268075	0.4311258948	a
10	M_UVS	Chrom_JND	CM	4.3224268236	0.954281176	0.4267675159	a
11	M_UVS	Chrom_JND	LTS	3.5645803314	0.9196979449	0.4113014247	ab
12	M_UVS	Chrom_JND	AK_LTS	2.0441256859	0.260180358	0.1163561934	b
13	M_VS	Chrom_JND	HC	2.9685830369	0.815298795	0.3646127055	ab
14	M_VS	Chrom_JND	CM	4.2433346271	0.8996160619	0.4023205336	a
15	M_VS	Chrom_JND	LTS	2.0361637087	0.5155885218	0.2305781966	b
16	M_VS	Chrom_JND	AK_LTS	1.7143213147	0.3714139845	0.1661013834	b
17	T_UVS	Chrom_JND	HC	3.8408980613	1.0173516782	0.4549735019	a
18	T_UVS	Chrom_JND	CM	3.7639739969	0.9316454183	0.4166444972	a
19	T_UVS	Chrom_JND	LTS	3.8084702386	0.955462674	0.4272958978	a
20	T_UVS	Chrom_JND	AK_LTS	2.0117301515	0.5206193442	0.2328280488	b
21	T_VS	Chrom_JND	HC	2.6181219399	0.7551906167	0.337731511	ab
22	T_VS	Chrom_JND	CM	3.5698826916	0.8151301011	0.3645372633	a
23	T_VS	Chrom_JND	LTS	1.9292653581	0.4417831266	0.1975714205	b
24	T_VS	Chrom_JND	AK_LTS	1.5308518257	0.1295372977	0.0579308406	bc
25	B_UVS	Achrom_JND	HC	13.9049576	3.0424183014	1.3606108276	a
26	B_UVS	Achrom_JND	CM	14.9563583309	3.0424183009	1.3606108274	a
27	B_UVS	Achrom_JND	LTS	14.0238907714	3.0424183077	1.3606108304	a
28	B_UVS	Achrom_JND	AK_LTS	2.8230740225	1.3861649264	0.6199118007	b
29	B_VS	Achrom_JND	HC	13.6412933267	3.0515988819	1.364716508	a
30	B_VS	Achrom_JND	CM	14.6876310327	3.0515988819	1.364716508	a
31	B_VS	Achrom_JND	LTS	13.8349419571	3.0515988722	1.3647165037	a
32	B_VS	Achrom_JND	AK_LTS	2.8124695913	1.4145539221	0.6326077455	b
33	M_UVS	Achrom_JND	HC	11.8320307	1.1090587354	0.4959861447	ab
34	M_UVS	Achrom_JND	CM	12.2697546491	1.1090587353	0.4959861446	ab
35	M_UVS	Achrom_JND	LTS	15.3493469057	1.1090587279	0.4959861413	a
36	M_UVS	Achrom_JND	AK_LTS	1.9960145875	0.4554908672	0.2037017084	b
37	M_VS	Achrom_JND	HC	11.55635334	1.1000218987	0.4919447485	ab
38	M_VS	Achrom_JND	CM	11.9984530182	1.10002191	0.4919447535	ab
39	M_VS	Achrom_JND	LTS	15.1254871	1.1000219054	0.4919447514	a
40	M_VS	Achrom_JND	AK_LTS	1.9484051175	0.4538909831	0.2029862185	b
41	T_UVS	Achrom_JND	HC	9.2845421867	0.9489633064	0.4243892923	b
42	T_UVS	Achrom_JND	CM	9.72609346	0.9489633176	0.4243892973	ab
43	T_UVS	Achrom_JND	LTS	12.2546647571	0.9489633156	0.4243892964	a
44	T_UVS	Achrom_JND	AK_LTS	1.6582385875	0.231660618	0.1036017779	b
45	T_VS	Achrom_JND	HC	9.0095996867	0.9320994821	0.4168475607	ab
46	T_VS	Achrom_JND	CM	9.4715136236	0.9320994883	0.4168475635	a
47	T_VS	Achrom_JND	LTS	12.0338027	0.9320994869	0.4168475629	a
48	T_VS	Achrom_JND	AK_LTS	1.6315821175	0.2189767572	0.0979293829	b
